# Supplementary material
Source: publisher figshare collection journal article supplement (https://acs.figshare.com/ndownloader/files/15107741)
Supplement: Supplementary file 1 [file 15107741]

**Supporting Information for**

**The Role of Mineral Nutrients in Plant-Mediated Synthesis of 3D Porous LaCoO<sub>3</sub>**

*Kuncan Wang,<sup>a</sup> Junjie Huang,<sup>a</sup> Wen Li,<sup>b</sup> Jiale Huang,<sup>a</sup> Daohua Sun,<sup>a</sup> Xuebin Ke <sup>\*c</sup>*

*and Qingbiao Li <sup>\*a</sup>*

<sup>a</sup> Department of Chemical and Biochemical Engineering, College of Chemistry and Chemical Engineering, National Laboratory for Green Chemical Productions of Alcohols, Ethers and Esters, Key Lab for Chemical Biology of Fujian Province, Xiamen University, Xiamen 361005, P. R. China.

<sup>b</sup> Department of Ecological Engineering for Environmental Sustainability, College of the Environment & Ecology, Xiamen University, Xiamen 361102, P. R. China.

<sup>c</sup> School of Engineering and Computer Science, University of Hull, HU6 7RX, United Kingdom.

**\* Corresponding Author**

E-mail address: kelqb@xmu.edu.cn (Qingbiao Li); x.ke@hull.ac.uk (Xuebin Ke)

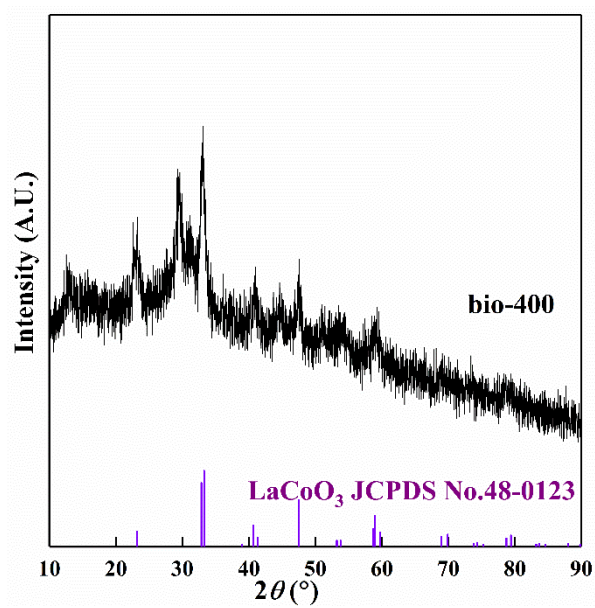

**Figure S1.** XRD pattern of bio-400 (sample that synthesized at 400 °C with the assistance of *Cacumen platycladi* extract).

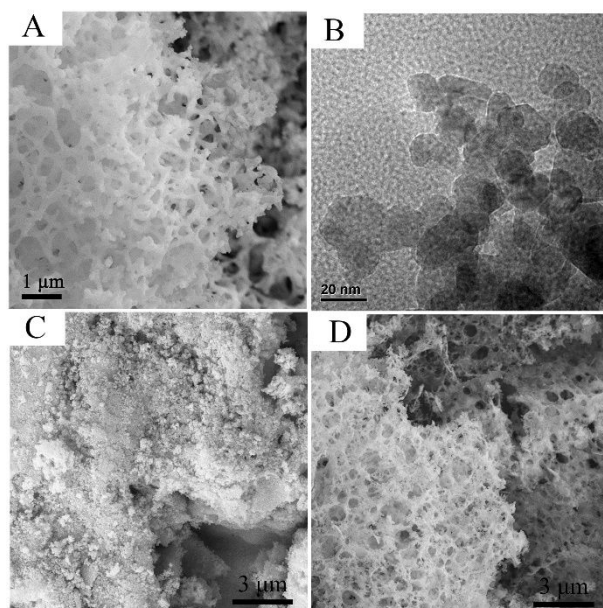

**Figure S2.** SEM images of: (A) chem-500(S), (C) bio-500(L), (D) bio-500(H), and TEM image of (B) chem-500(S).

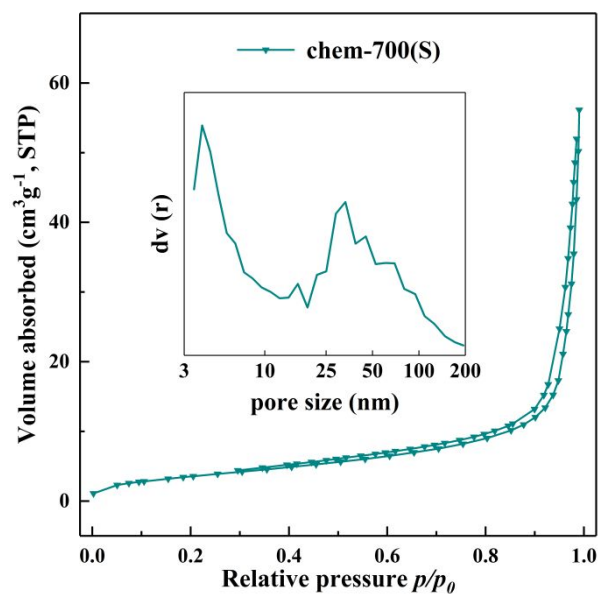

**Figure S3.** N<sub>2</sub> adsorption-desorption isotherms of chem-700(S). The inset is its pore-size distributions.

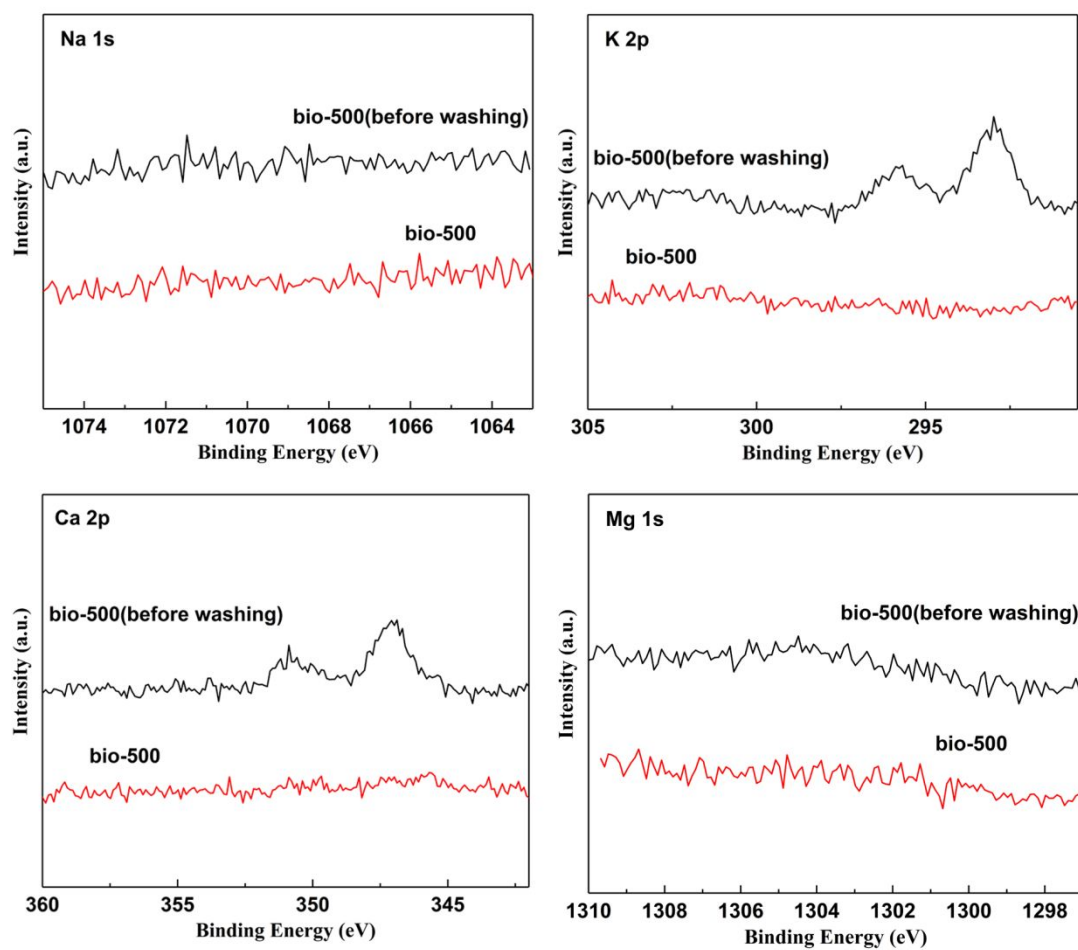

**Figure S4.** XPS spectra of Na 1s, K 2p, Ca 2p and Mg 1s of bio-500(before washing) and bio-500.

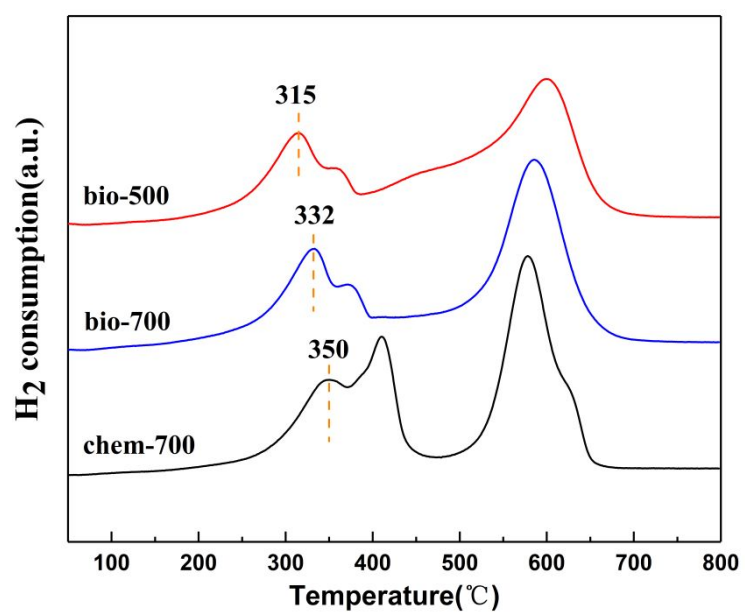

**Figure S5.** H<sub>2</sub>-TPR profiles of bio-500, bio-700 and chem-700.

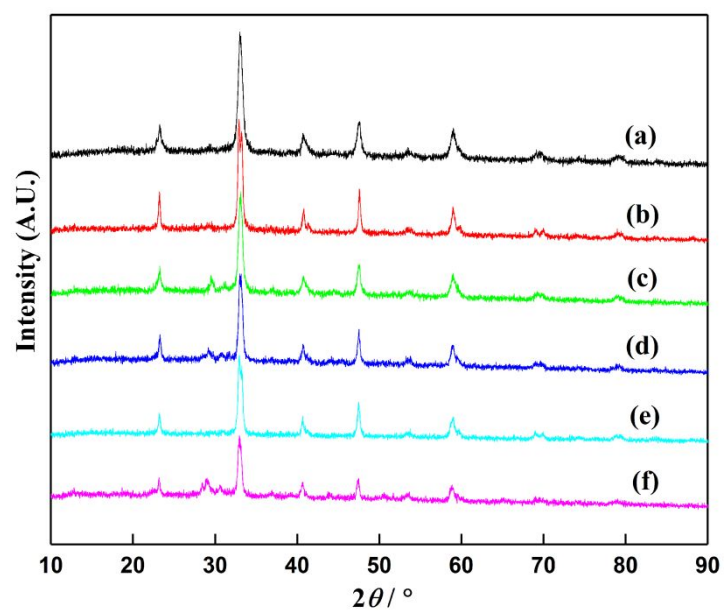

**Figure S6.** XRD patterns of (a) oolong tea leaf, (b). *Nerium Indicum Mill.* leaf, (c) *Cinnamomum camphora* leaf, (d) *Rosa chinensis* leaf, (e) *Banyan* leaf and (f) grass.

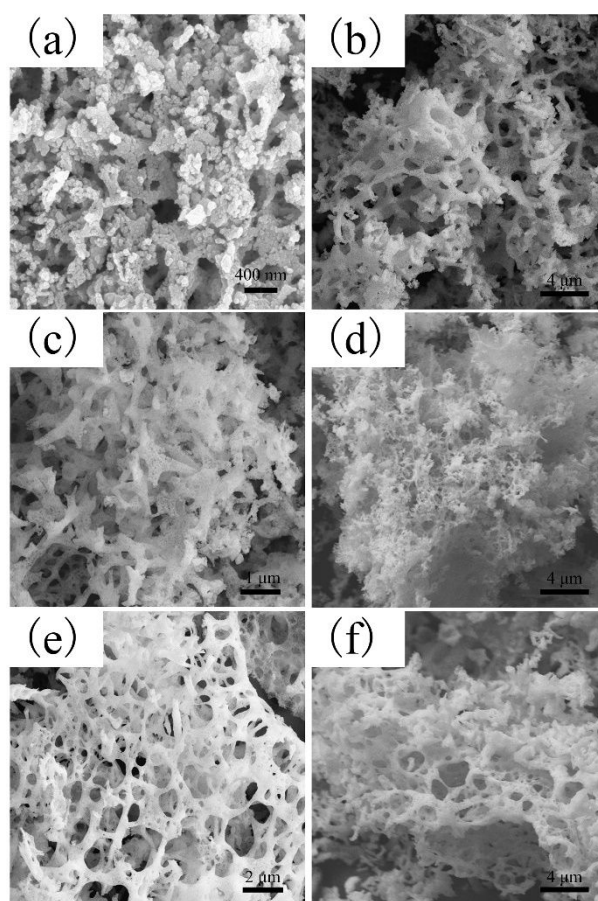

**Figure S7.** SEM images of (a) oolong tea leaf, (b). *Nerium Indicum Mill.* leaf, (c) *Cinnamomum camphora* leaf, (d) *Rosa chinensis* leaf, (e) *Banyan* leaf and (f) grass.



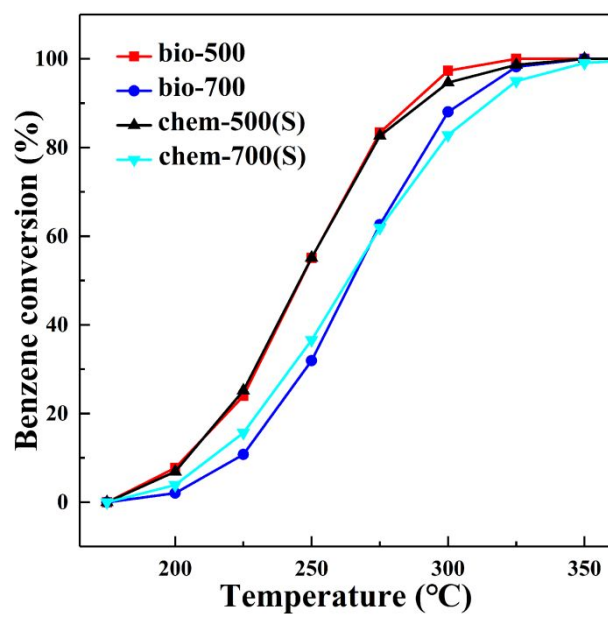

**Figure S8.** Benzene conversion as a function of reaction temperature over the samples.
